# Supplementary material
Source: MDPI journal article supplement (https://www.mdpi.com/2220-9964/9/8/484)
Supplement: s1 [file s1]

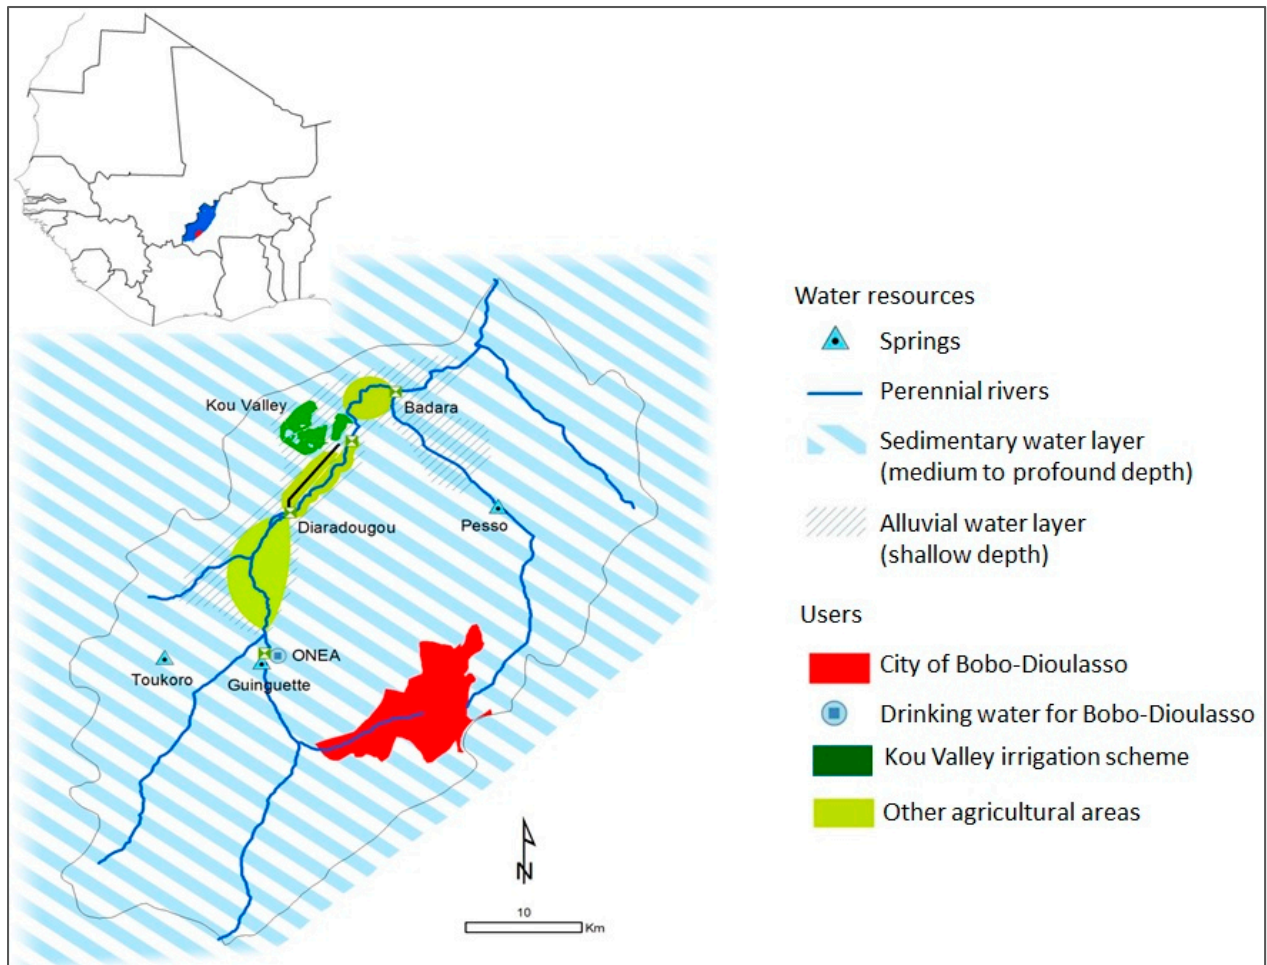

**Figure. S1.** The Kou watershed: its water resources and users. Source: adapted from [32].

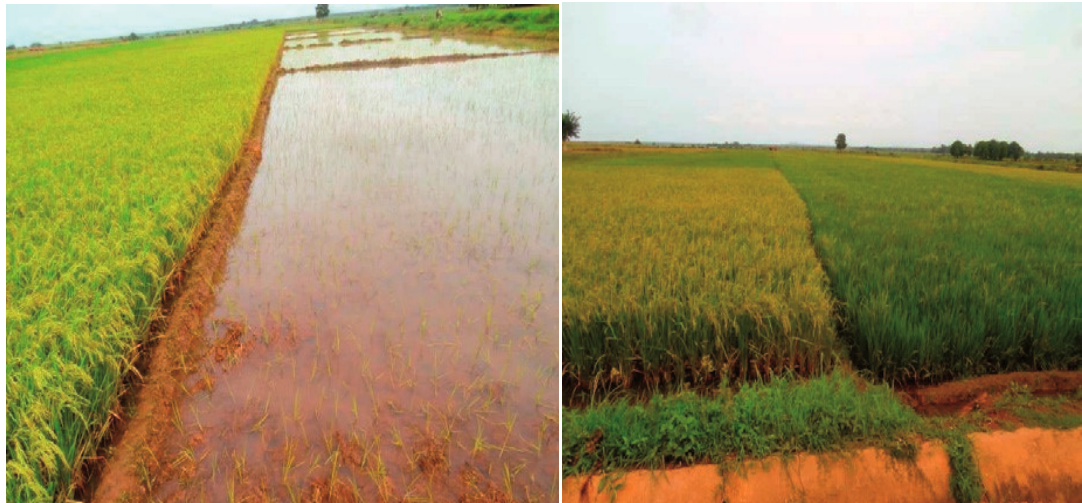

**Figure. S2.** Different growth stages of rice observed during the 2014 cropping season in the Kou Valley irrigation scheme. Left: view on February 2014. Right: view on May 2014 (photo credit: Alidou Sawadogo).
